# Supplementary material
Source: PubMed Central journal article supplement (PMC3439559)
Supplement: NIHMS373950-supplement-01.pdf [file NIHMS373950-supplement-01.pdf]

**Table S1.** Baseline Characteristics of Study Participants According to Baseline Plasma 25(OH)D Concentrations

|                                   | 25-hydroxyvitamin D |                      |                     | P-value |
|-----------------------------------|---------------------|----------------------|---------------------|---------|
|                                   | < 10 ng/mL<br>n=147 | 10-30 ng/mL<br>n=763 | > 30 ng/mL<br>n=189 |         |
| Age (years)                       | 65 ± 11             | 69 ± 11              | 71 ± 10             | <0.001  |
| Race (%)                          |                     |                      |                     |         |
| Black                             | 54.9                | 30.5                 | 15.7                | <0.001  |
| Diabetes (%)                      | 62.5                | 55.9                 | 45.0                | 0.001   |
| Hypertension (%)                  | 95.1                | 97.1                 | 94.8                | 0.7     |
| CVD (%)                           | 54.9                | 56.2                 | 60.7                | 0.3     |
| BMI (kg/m <sup>2</sup> )          | 29.1 ± 5.4          | 28.1 ± 4.8           | 26.7 ± 4.4          | <0.001  |
| Systolic Blood Pressure (mmHg)    | 141 ± 24            | 144 ± 23             | 143 ± 23            | 0.6     |
| eGFR (mL/min/1.73m <sup>2</sup> ) | 18 ± 7.0            | 18 ± 6.3             | 19 ± 6.4            | 0.1     |
| Medication (%)                    |                     |                      |                     |         |
| ACE Inhibitor                     | 45.1                | 41.1                 | 38.2                | 0.2     |
| Beta-blocker                      | 59.7                | 59.7                 | 58.1                | 0.7     |
| Lipid-lowering                    | 51.4                | 59.2                 | 50.8                | 0.7     |
| Albumin (g/dL)                    | 3.9 ± 0.5           | 4.1 ± 0.5            | 4.3 ± 0.5           | <0.001  |
| Total Cholesterol (mg/dL)         | 183 ± 55            | 174 ± 42             | 165 ± 40            | <0.001  |
| HDL-C (mg/dL)                     | 45 ± 16             | 42 ± 15              | 44 ± 13             | 0.6     |
| LDL-C (mg/dL)                     | 98 ± 37             | 95 ± 32              | 92 ± 33             | 0.09    |
| Triglycerides (mg/dL)             | 198 ± 164           | 192 ± 140            | 144 ± 73            | <0.001  |

Values are expressed as means ± standard deviation unless otherwise specified. Abbreviations:

25(OH)D=25-hydroxyvitamin D;

1,25(OH)<sub>2</sub>=1,25-dihydroxyvitamin D; CVD= cardiovascular disease; BMI= body mass index; iPTH=intact parathyroid hormone;

FGF23=fibroblast growth factor-23; eGFR=estimated glomerular filtration rate; ACE= angiotensin converting enzyme inhibitor;

HDL-C=high-density lipoprotein cholesterol; LDL-C=low-density lipoprotein cholesterol.

Note conversion factors for units: eGFR in ml/min/1.73m<sup>2</sup> to mL/s/1.73m<sup>2</sup> x0.01667; serum 25(OH)D in ng/mL to nmol/L x 2.496;

1,25(OH)<sub>2</sub>D in pg/mL to pmol/L x2.6; serum calcium in mg/dL to mmol/L x 0.2495; serum phosphorus in mg/dL to mmol/L x0.3229;

Serum hemoglobin in g/dL to g/L x 10; serum albumin in g/dL to g/L x 10; serum total cholesterol mg/dL in mmol/L x 0.02586;

Serum LDL-C in mg/dL to mmol/L x 0.02586; serum HDL-C in mg/dL to mmol/L x 0.02586; serum triglycerides in mg/dL to mmol/L

X 0.01129.
