# Supplementary material
Source: PubMed Central journal article supplement (PMC3439559)
Supplement: NIHMS373950-supplement-03.pdf [file NIHMS373950-supplement-03.pdf]

Figure S2. Kaplan-Meier curve for initiation of maintenance dialysis according to baseline plasma 25-hydroxyvitamin D concentrations

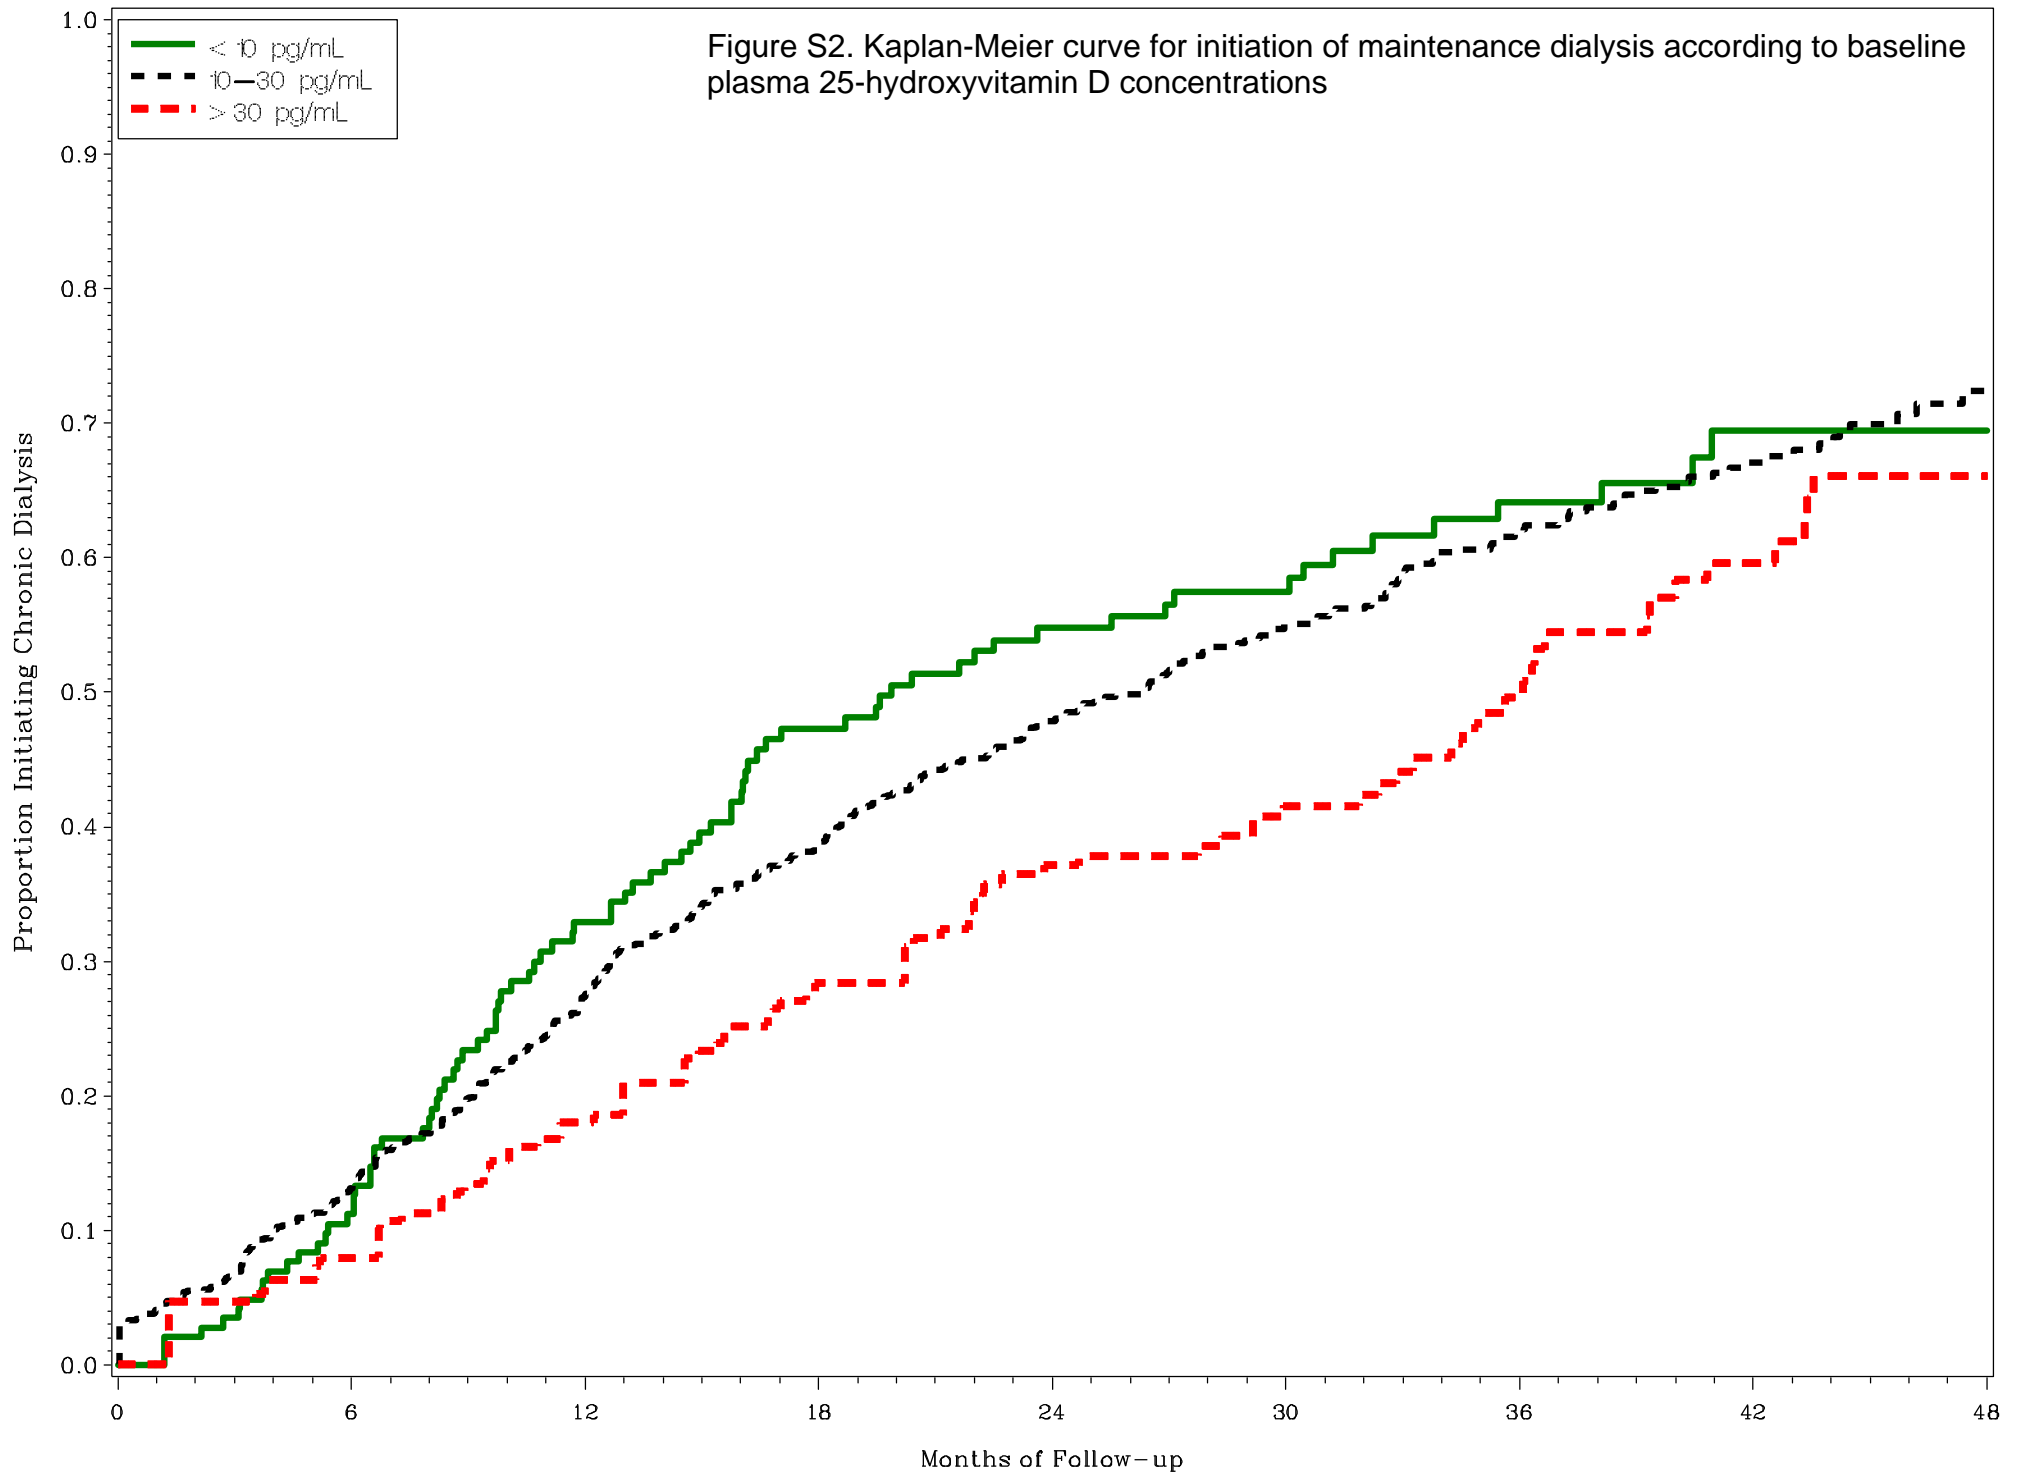

P-value for Log-rank test of equality over strata = 0.0134

Supplementary Figure S2; Kendrick et al, AJKD, "Associations of Plasma 25-Hydroxyvitamin D and 1,25-Dihydroxyvitamin D Concentrations With Death and Progression to Maintenance Dialysis in Patients With Advanced Kidney Disease"
