# Supplementary material
Source: PubMed Central journal article supplement (PMC3439559)
Supplement: NIHMS373950-supplement-05.pdf [file NIHMS373950-supplement-05.pdf]

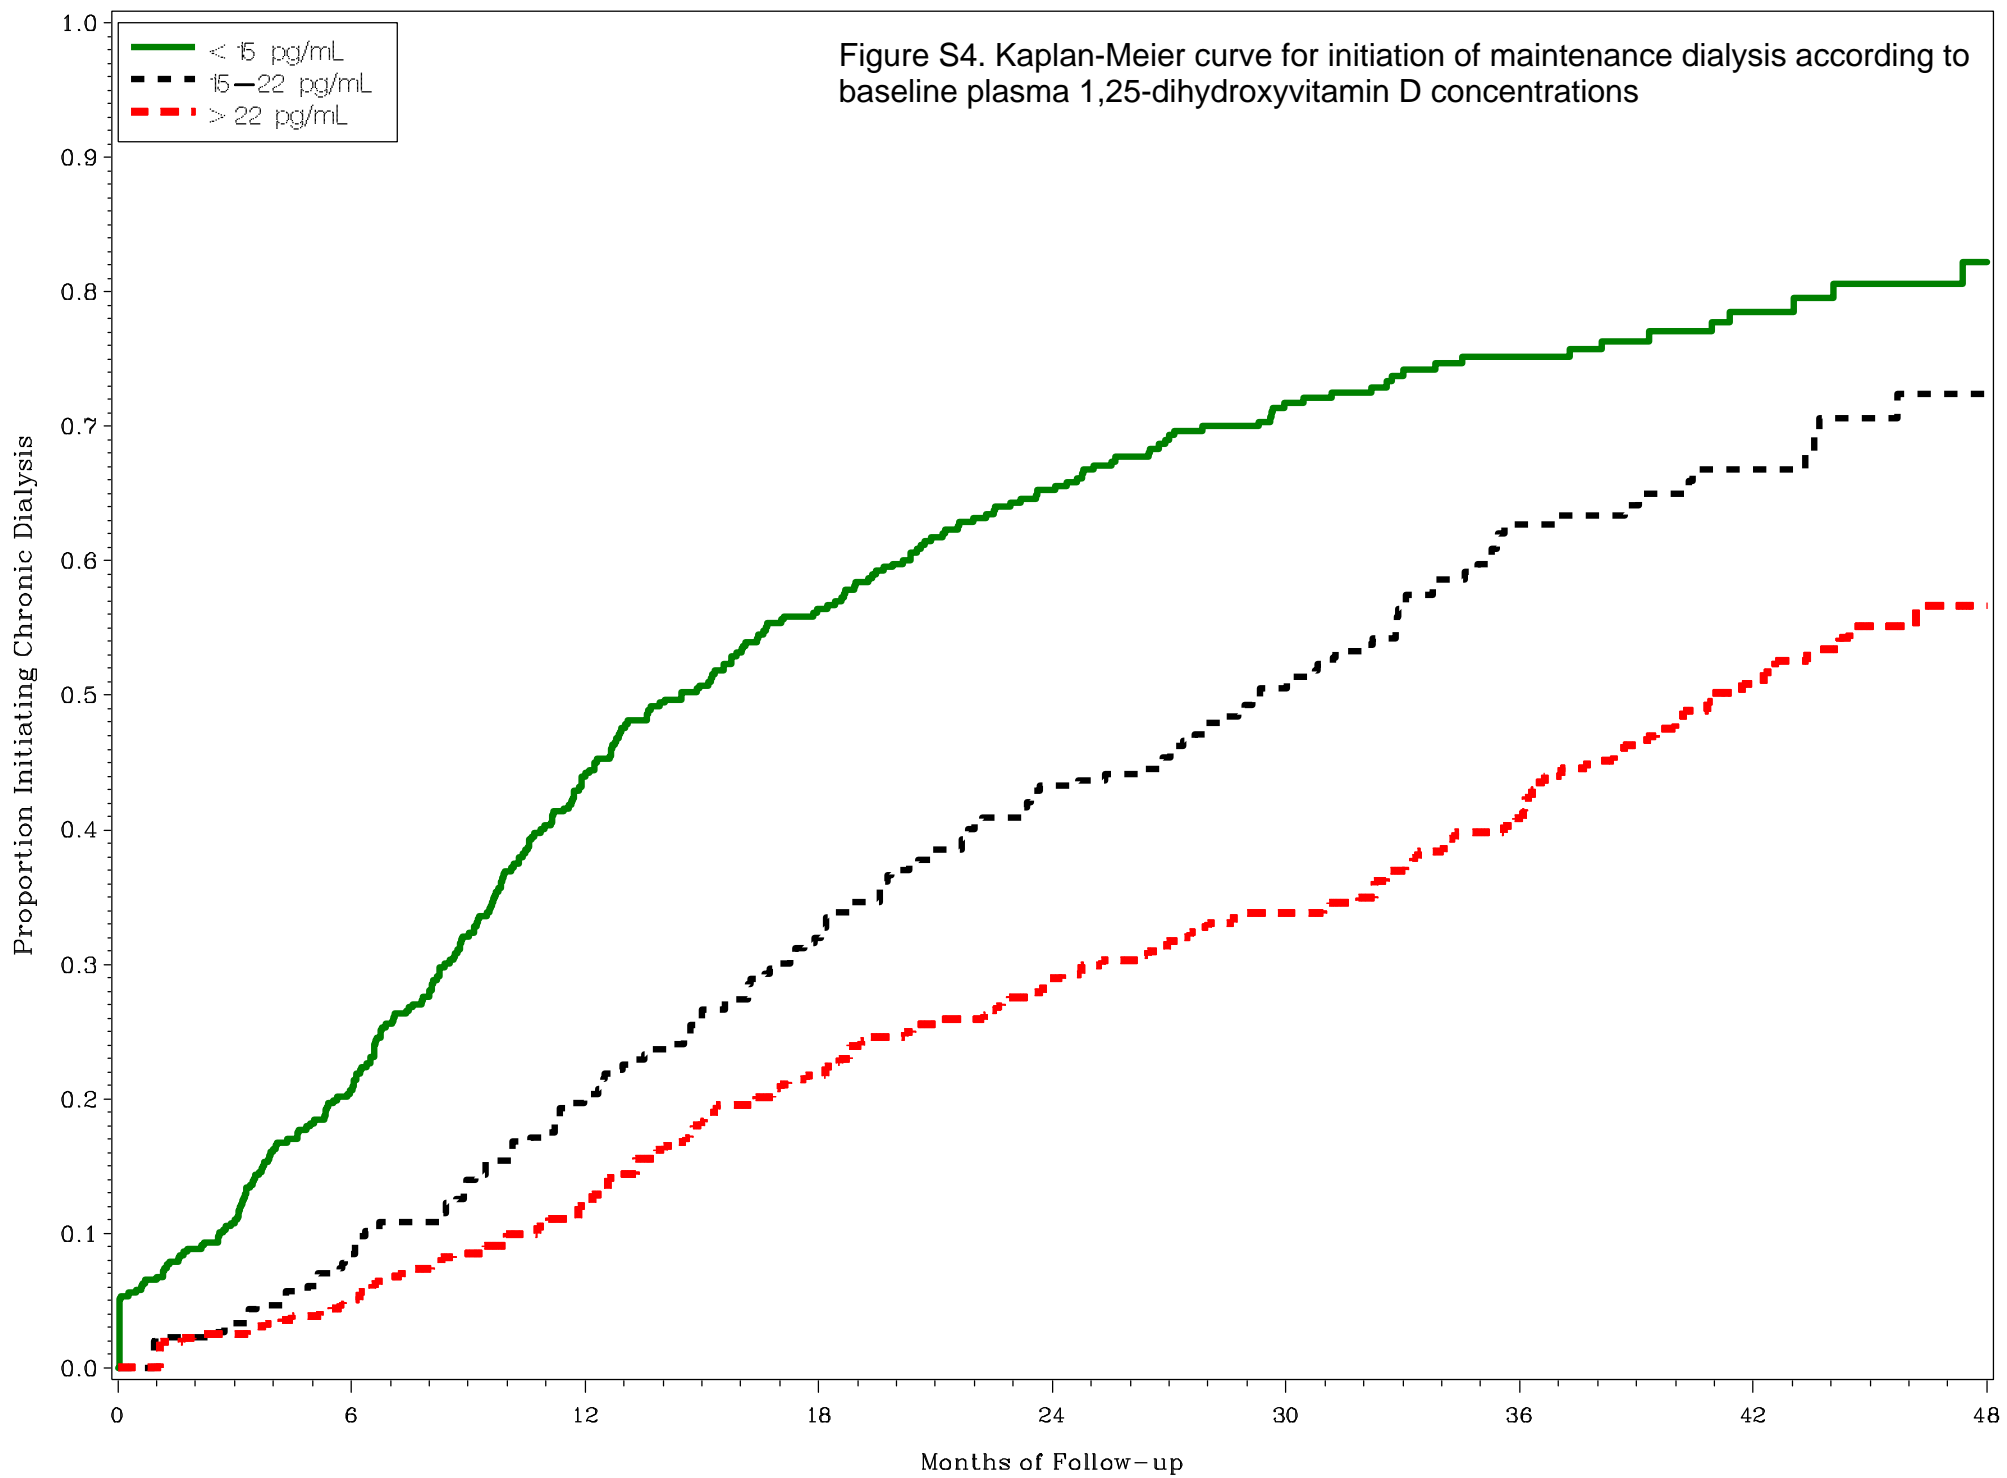

P-value for Log-rank test of equality over strata = <.0001

Supplementary Figure S4; Kendrick et al, AJKD, "Associations of Plasma 25-Hydroxyvitamin D and 1,25-Dihydroxyvitamin D Concentrations With Death and Progression to Maintenance Dialysis in Patients With Advanced Kidney Disease"
